# Supplementary material
Source: Springer Nature journal article supplement (https://www.springermedizin.de/resource/supplementary/13058_2010_9483_MOESM6_ESM.pdf/9702266)

**IP: HIF-1 $\alpha$**

|                                                |   |    |    |    |
|------------------------------------------------|---|----|----|----|
| <b>ARNT</b>                                    | - | -  | -  | +  |
| <b>HIF-1<math>\alpha</math></b>                | + | +  | +  | +  |
| <b>ER<math>\beta</math>(<math>\mu</math>g)</b> | - | 10 | 20 | 20 |

130

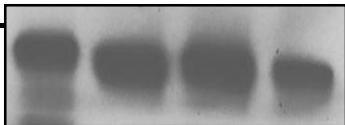

**IB: HIF-1 $\alpha$**

95

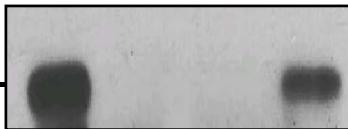

**IB: ARNT**

Supplement: MOESM6 [file 9702266]
